# Supplementary material for: Etching of electrodeposited Cu2O films using ammonia solution for photovoltaic applications
Source: Royal Society of Chemistry journal article supplement (doi:10.1039/c5cp06385j), 2016-01-01
Supplement: c5cp06385j1.pdf [file c5cp06385j1.pdf]

## Electronic Supplementary Information

### Etching of Electrodeposited Cu<sub>2</sub>O Films Using Ammonia Solution for Photovoltaic Applications

*Changqiong Zhu and Matthew J. Panzer\**

Department of Chemical & Biological Engineering

Tufts University

4 Colby St., Medford, MA 02155, USA

\* Email: [matthew.panzer@tufts.edu](mailto:matthew.panzer@tufts.edu)

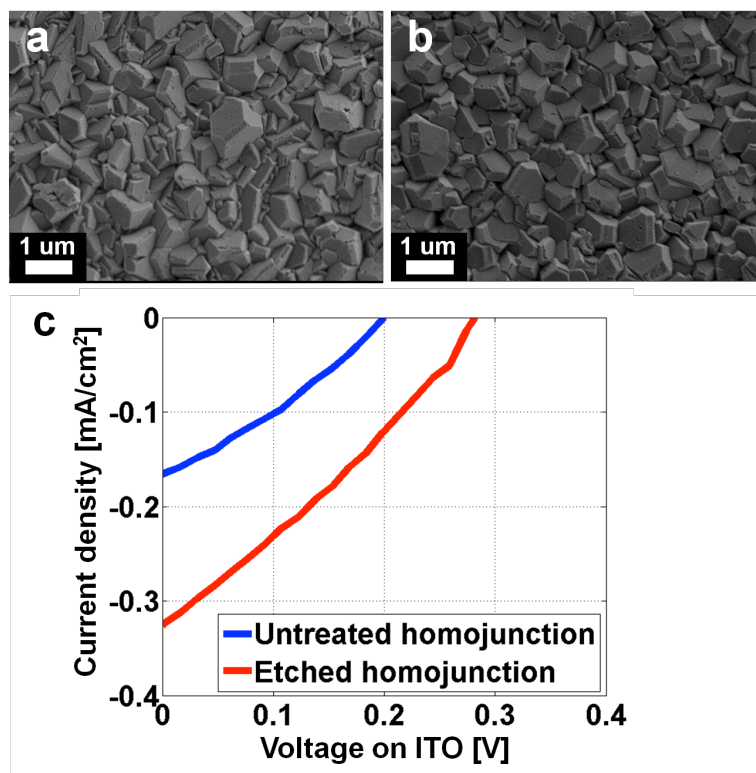

**Figure S1** Top view SEM images of: (a) untreated homojunction with as-deposited p-Cu<sub>2</sub>O (~2 μm thick) as the bottom layer; (b) etched homojunction with 10 min. etched p-Cu<sub>2</sub>O (~2 μm thick) as the bottom layer. (c) Current density-voltage characteristics of the two homojunction PV devices under 100 mW/cm<sup>2</sup> simulated solar illumination.

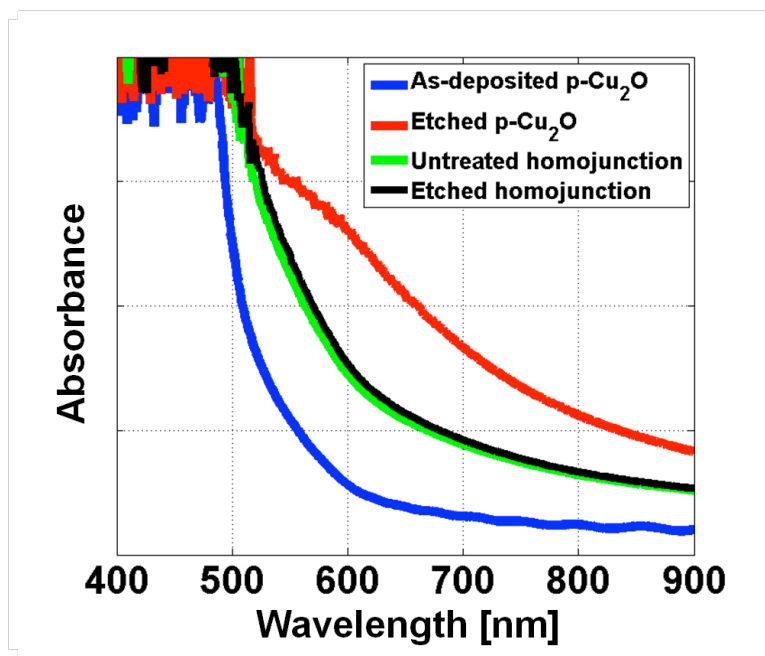

**Figure S2** UV-Visible absorption spectra of: a  $\sim 2$   $\mu\text{m}$  thick as-deposited p-Cu<sub>2</sub>O film, an identically prepared p-Cu<sub>2</sub>O film etched by ammonium hydroxide solution for 10 min., the untreated homojunction incorporating the as-deposited p-Cu<sub>2</sub>O layer, and the etched homojunction incorporating the etched p-Cu<sub>2</sub>O layer.

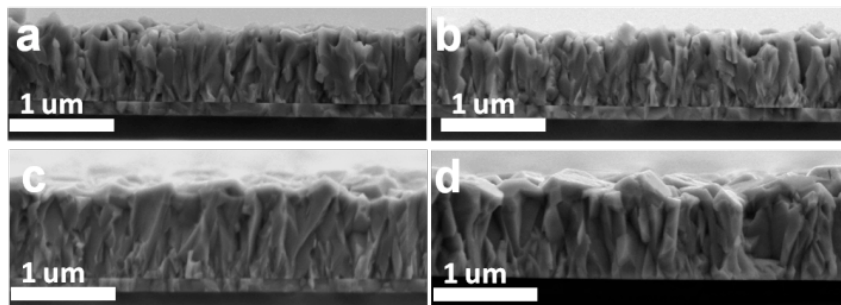

**Figure S3** SEM cross-sectional view images of electrodeposited films grown on ITO-coated glass substrates: (a) ~750 nm thick p-Cu<sub>2</sub>O film as-deposited; (b) identically prepared p-Cu<sub>2</sub>O film etched by ammonium hydroxide solution for 1 min.; (c) untreated homojunction with the as-deposited p-Cu<sub>2</sub>O film as the bottom layer; (d) etched homojunction with the etched p-Cu<sub>2</sub>O film as the bottom layer.

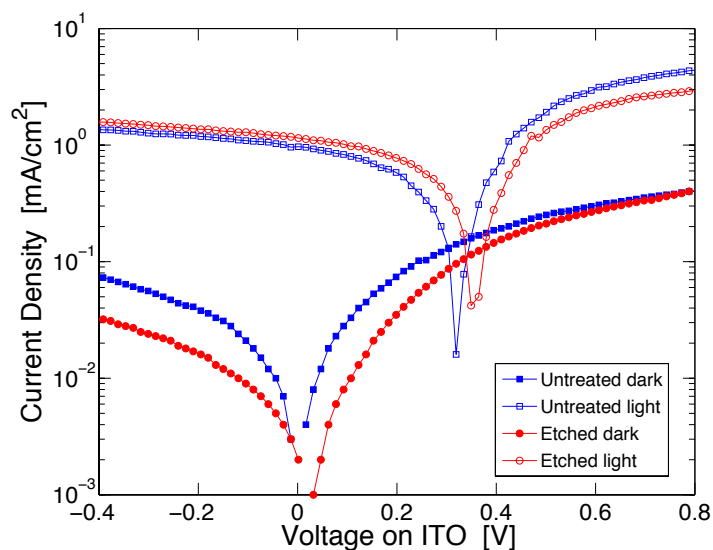

**Figure S4** Current density-voltage characteristics of an untreated homojunction vs. an etched homojunction device measured both in the dark (filled symbols) and under 100 mW/cm<sup>2</sup> simulated solar illumination (open symbols). Both homojunctions were constructed using identically prepared p-Cu<sub>2</sub>O (~750 nm thick) bottom layers; the etched homojunction p-Cu<sub>2</sub>O bottom layer was etched by ammonium hydroxide solution for 1 min.
